# Supplementary material for: Patterns of Predicted T-Cell Epitopes Associated with Antigenic Drift in Influenza H3N2 Hemagglutinin
Source: PubMed Central journal article supplement (PMC3200361; doi:10.1371/journal.pone.0026711), 2011-10-24

Figure S4: Cluster dendrogram of predicted binding patterns of peptides in 447 HA1 to DRB1\*04:01

HA1 from 447 H3N2 viruses covering the period for 1968 – 2002 were clustered by their  $\ln(\text{ic}_{50})$  values for each HLA. Hierarchical clustering using the Ward method was carried out using 23 clusters [3]. The cluster count was based on preliminary determination of optimum cluster number from K-means clustering. This analysis yielded optimum clusters numbers ranging from 17-23 depending on the HLA. For the remainder of analysis 23 clusters were used. The binding data for each HLA was first submitted to principal component analysis and the mean of the first principal component was used as an ordering variable [3].

(large figure on next page, zoom for detail)

Report: Unlited 26

Page 1 of 2

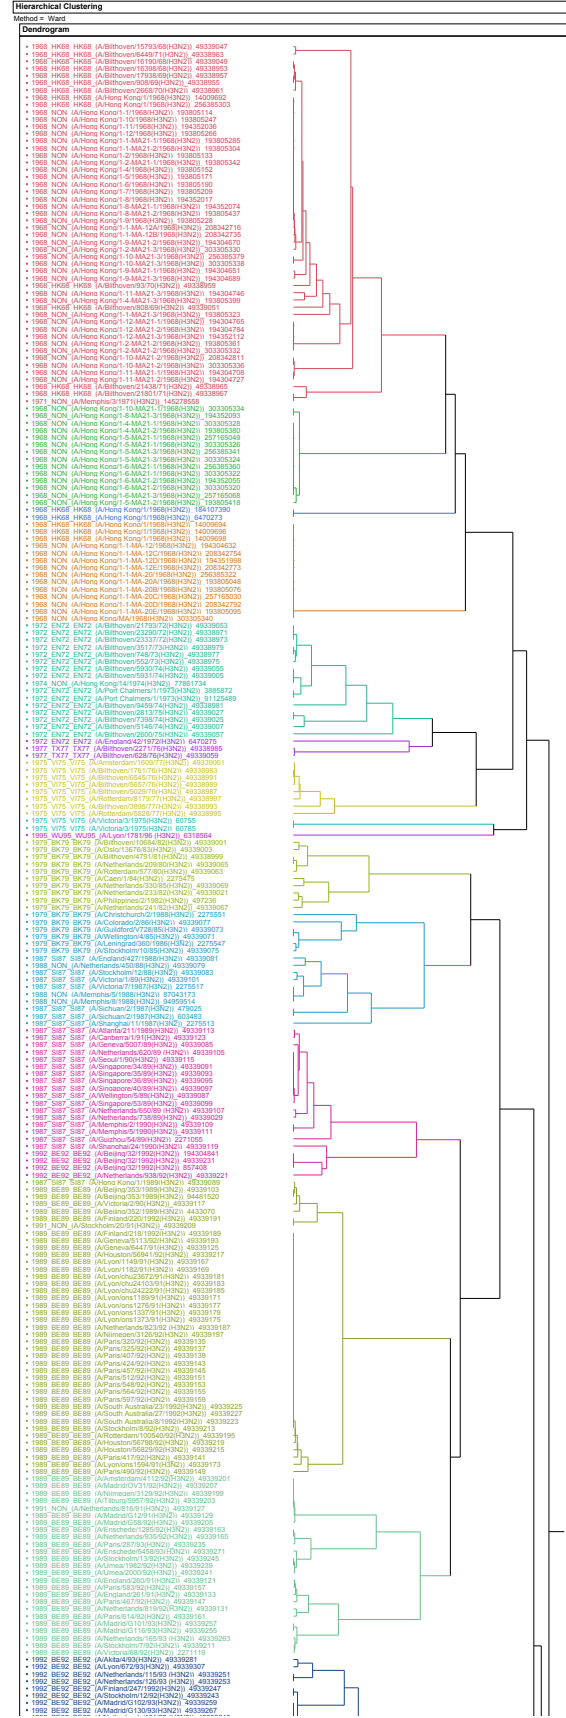

Report: Unlited 26

Page 2 of 2

Hierarchical Clustering

Dendrogram

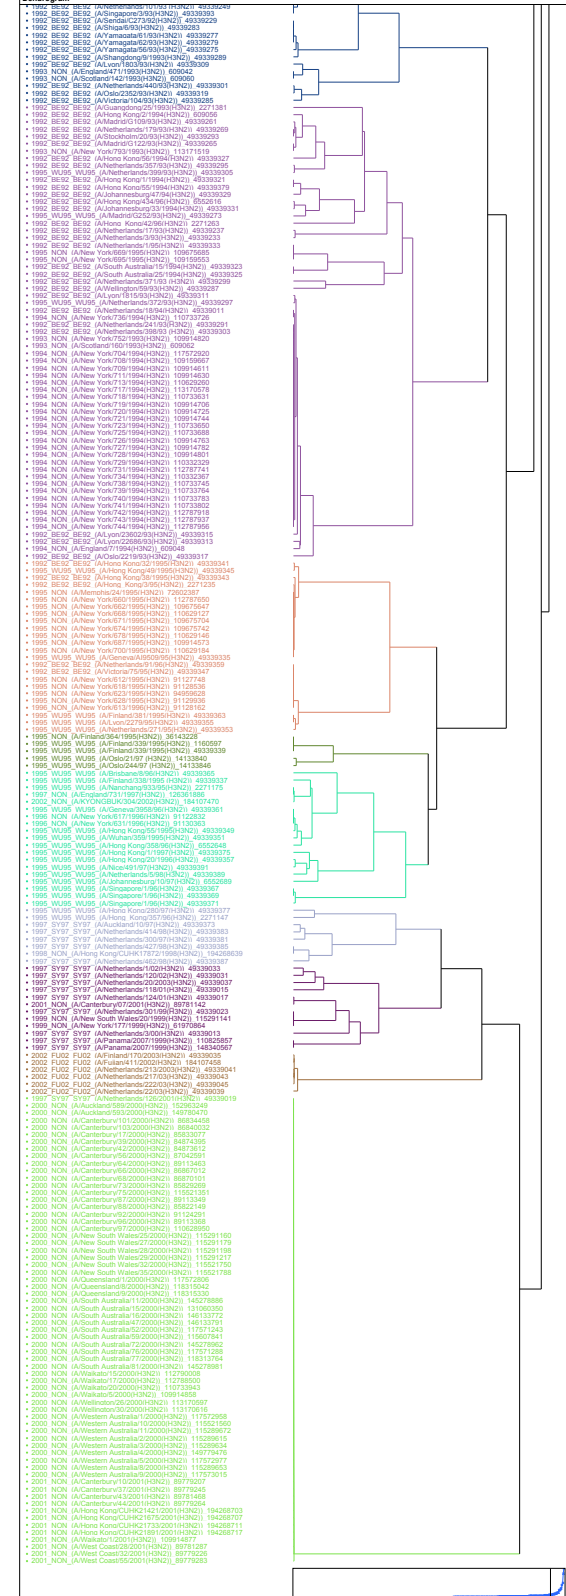

Supplement: pone.0026711.s004.pdf [file pone.0026711.s004.pdf]
