# Supplementary material for: Patterns of Predicted T-Cell Epitopes Associated with Antigenic Drift in Influenza H3N2 Hemagglutinin
Source: PubMed Central journal article supplement (PMC3200361; doi:10.1371/journal.pone.0026711), 2011-10-24
Supplement: pone.0026711.s005.pdf [file pone.0026711.s005.pdf]

Figure S5: Hierarchical clusters of predicted MHC-I and MHC-II binding to HA1 from additional cluster representative isolates.

Hierarchical clustering of predicted binding of multiple MHC-I and MHC-II to consecutive peptides in HA1 of each cluster representative virus listed in Table 1 was done by the method of Ward using standardized binding data. The binding data for each HLA was first submitted to principal component analysis and the mean of the first principal component was used as an ordering variable. A comparable plot of binding to HA1 of Influenza A/Bilthoven/16190/68 is shown in Figure 3. The color scale shows the  $\ln(\text{ic}_{50})$ .

# MHC-I

## EN72

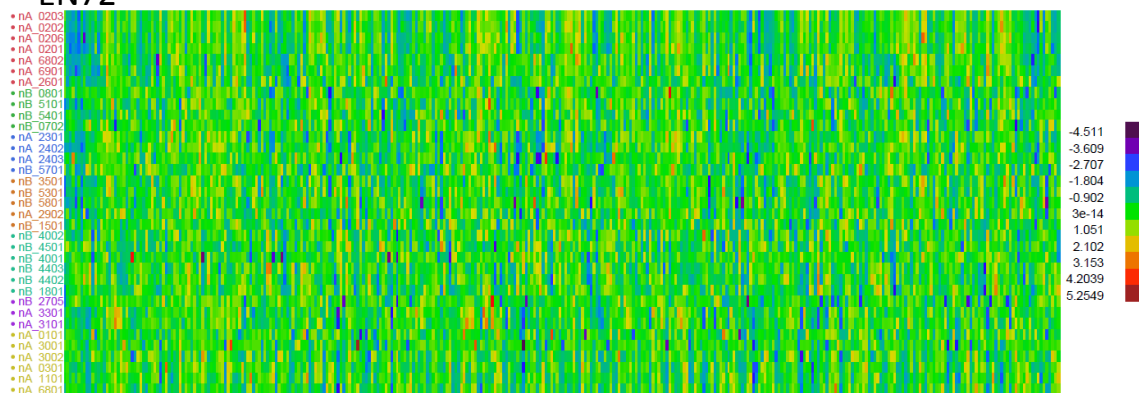

## VI75

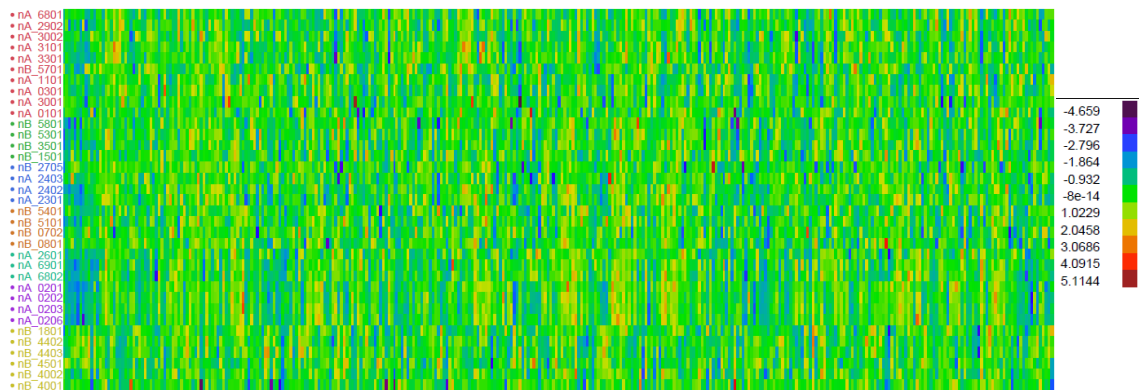

## SI87

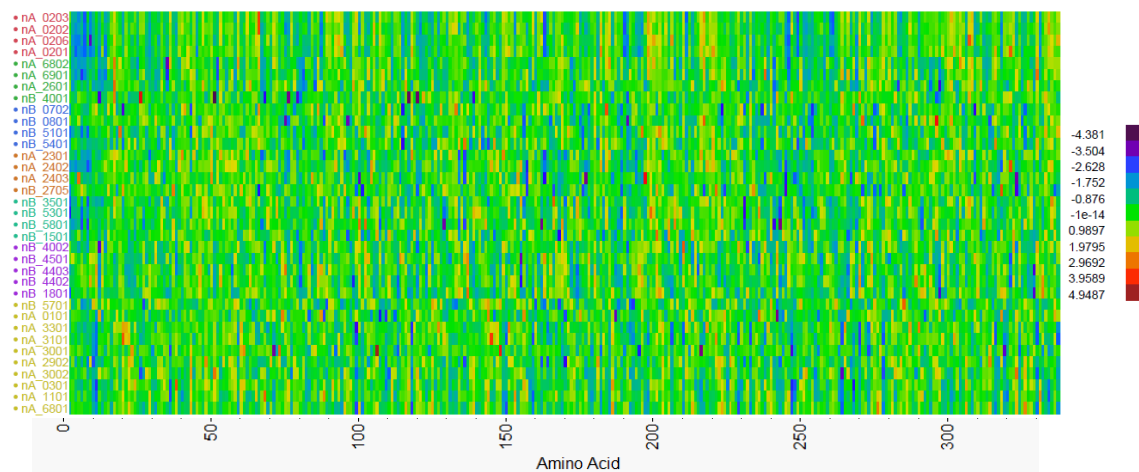

# MHC-I

## BK79

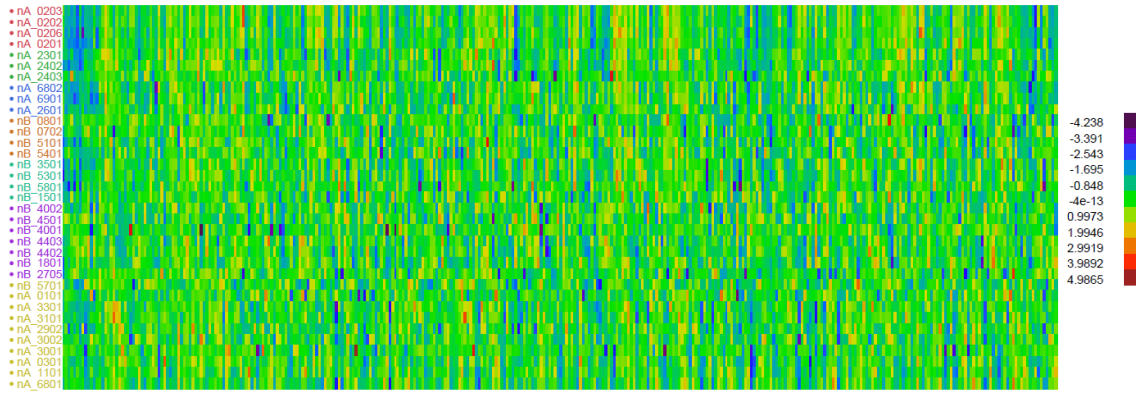

## BE89

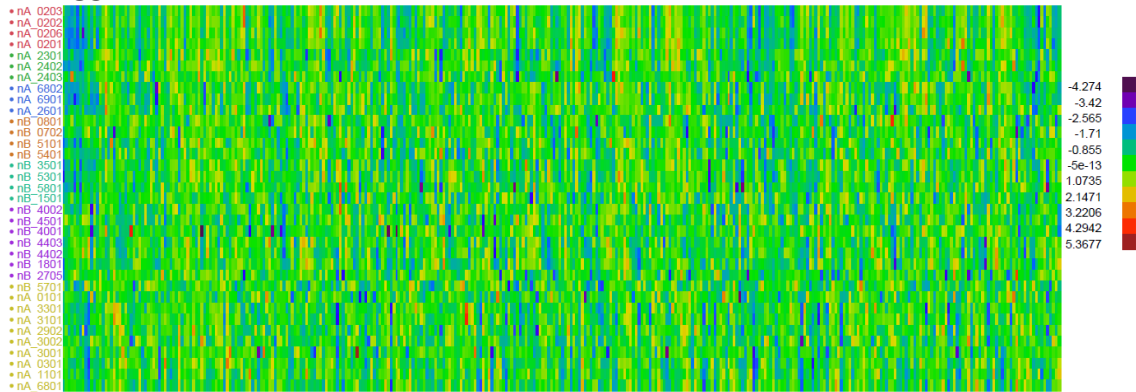

## BE92

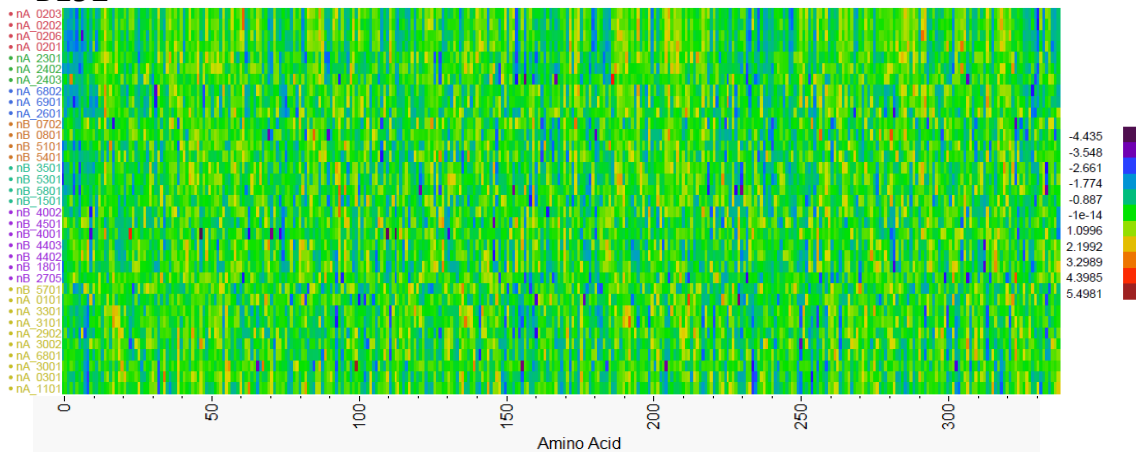

# MHC-I

## WU95

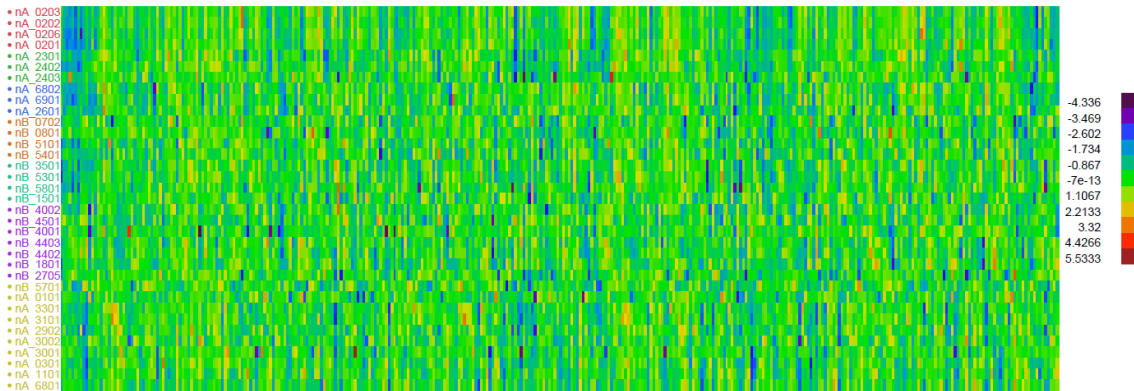

## SY97

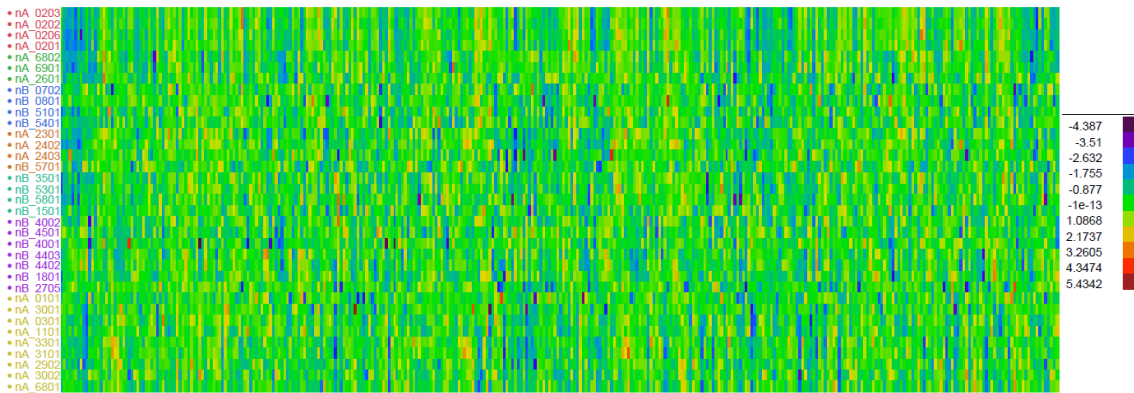

## FU02

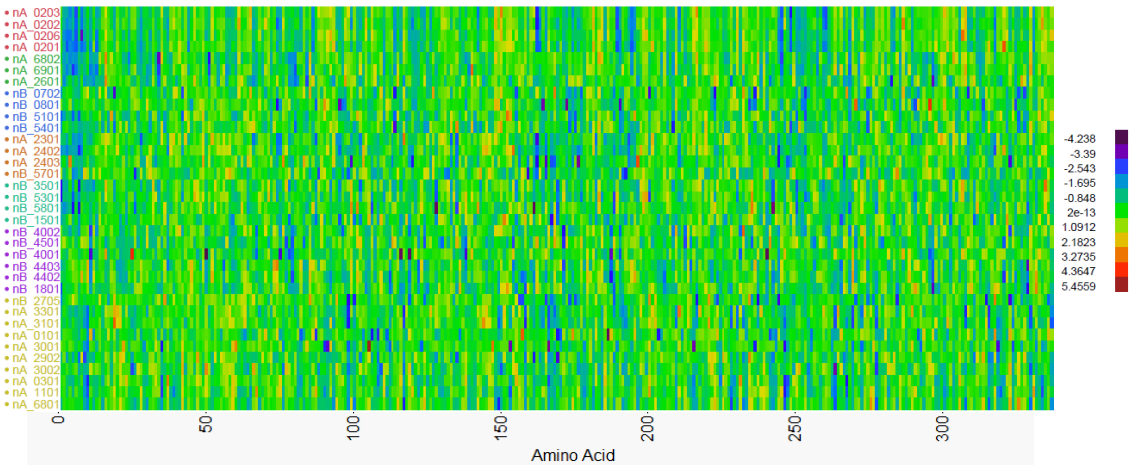

EN72

MHC-II

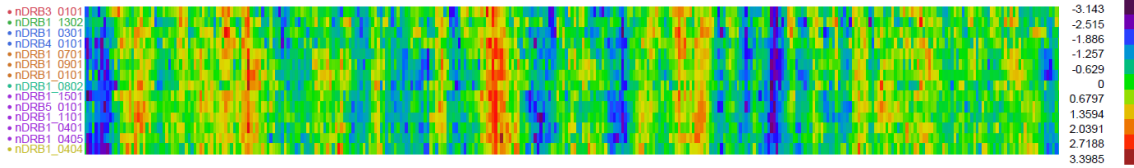

V175

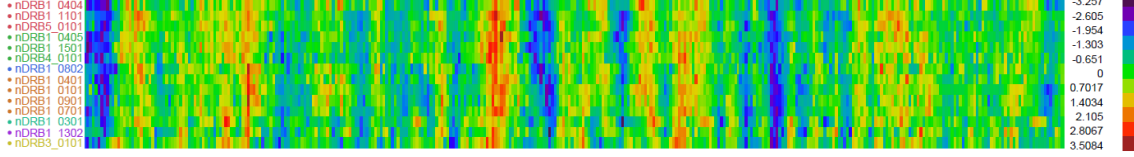

BK79

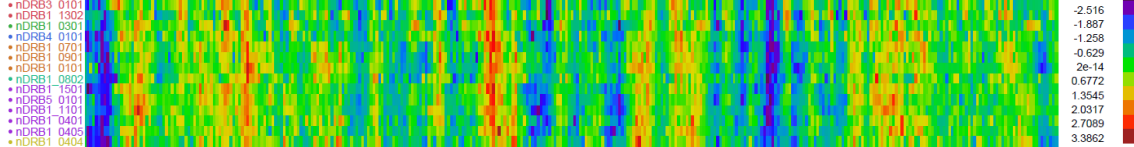

BE89

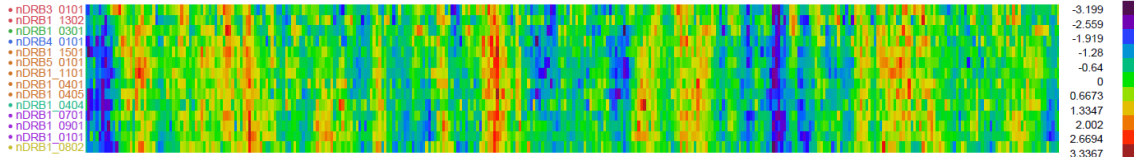

BE92

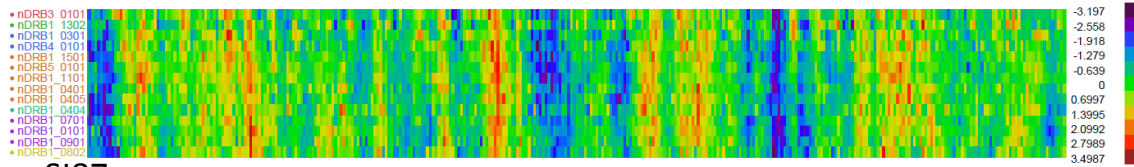

SI87

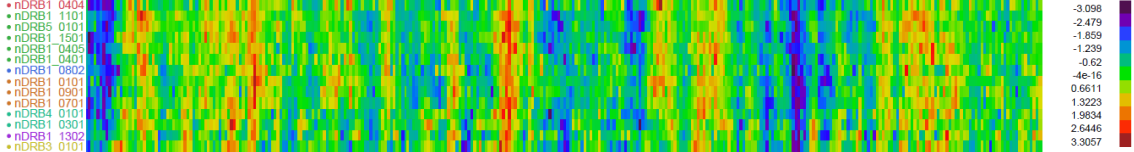

WU95

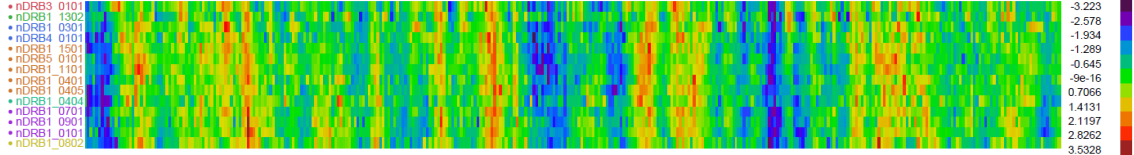

SY97

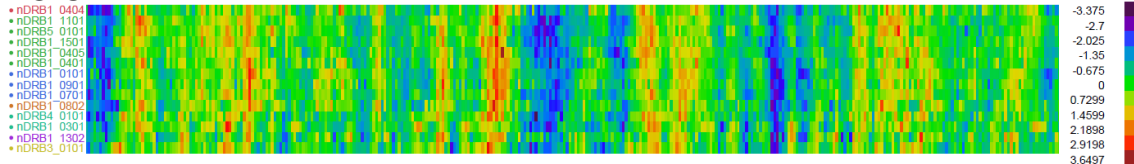

FU02

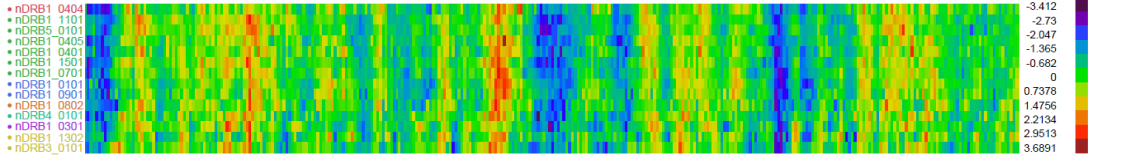

0 50 100 150 200 250 300 Amino Acid
