# Supplementary material for: Patterns of Predicted T-Cell Epitopes Associated with Antigenic Drift in Influenza H3N2 Hemagglutinin
Source: PubMed Central journal article supplement (PMC3200361; doi:10.1371/journal.pone.0026711), 2011-10-24
Supplement: pone.0026711.s007.pdf [file pone.0026711.s007.pdf]

Figure S7: Position of peptides in which change in MHC-II binding occurs in cluster transition.

These figures correspond to Figure 8 A,B, C and show the moderate changes in high affinity binding (-1 and +1 categories). The categorical classification of peptides according to whether they gained or lost high affinity binder status (Table 2) as a result of the transition between two cluster representative viruses (Table 1) was plotted across all HA1 amino acid positions for 14 MHC-II's. Each panel of nine lanes shows the changes in binding for the cluster transition indicated at the top of the panel (HK68-EN77 etc). Each of the lanes within the panel is the change in predicted binding affinity for a different MHC-II allele, left to right DRB1\*01:01, DRB1\*03:01, DRB1\*04:01, DRB1\*04:04, DRB1\*04:05, DRB1\*07:01, DRB1\*08:02, DRB1\*09:01, DRB1\*11:01, DRB1\*13:02, DRB1\*15:01, DRB3\*01:01, DRB4\*01:01, DRB5\*01:01. The red lines on each side are amino acid positions identified by Smith *et al* as key mutation points for antigenic drift, these are taken from Smith's Table I and corrected for the presence of signal peptides. The color scale shown in the scale at left is the count of amino acid changes at a given position which result in the category of change mapped.
