# Supplementary material for: Patterns of Predicted T-Cell Epitopes Associated with Antigenic Drift in Influenza H3N2 Hemagglutinin
Source: PubMed Central journal article supplement (PMC3200361; doi:10.1371/journal.pone.0026711), 2011-10-24
Supplement: pone.0026711.s009.pdf [file pone.0026711.s009.pdf]

Table S2: Example of data set showing change in predicted MHC binding affinity with cluster transition changes in amino acids.

MHC I (Highly mutable region) HK68 -> EN72 Transition

| Classification | Change            | Yr Old Cluster | Yr New Cluster | pos | Allele            | Old Peptide | New Peptide | Delta Peptide | Delta Pattern | Old Sigma | New Sigma | N         |             |       |       |   |
|----------------|-------------------|----------------|----------------|-----|-------------------|-------------|-------------|---------------|---------------|-----------|-----------|-----------|-------------|-------|-------|---|
| Lost           | Affinity Loss     | 1968_HK68      | 1972_EN72      | 166 | nB_0702           | RLNWLTKSG   | RLNWLYKSE   | RLNWL*KS*     | '000001001'   | -1.07     | 1.72      | 1         |             |       |       |   |
|                |                   |                |                |     | nB_0801           | RLNWLTKSG   | RLNWLYKSE   | RLNWL*KS*     | '000001001'   | -1.23     | 1.2       | 1         |             |       |       |   |
|                |                   |                |                | 168 | nA_0202           | NWLTKSGST   | NWLYKSECT   | NWL*KS**T     | '000100110'   | -1.48     | 0.3       | 1         |             |       |       |   |
|                |                   |                |                | 169 | nA_2402           | WLTKSGSTY   | WLYKSECTY   | WL*KS**TY     | '001001100'   | -3        | 0.86      | 1         |             |       |       |   |
|                |                   |                |                |     | nB_1501           | WLTKSGSTY   | WLYKSECTY   | WL*KS**TY     | '001001100'   | -2.04     | 0.53      | 1         |             |       |       |   |
|                |                   |                |                |     | nB_3501           | WLTKSGSTY   | WLYKSECTY   | WL*KS**TY     | '001001100'   | -1.85     | 0.86      | 1         |             |       |       |   |
|                |                   |                |                |     | nB_4001           | WLTKSGSTY   | WLYKSECTY   | WL*KS**TY     | '001001100'   | -1.01     | 0.97      | 1         |             |       |       |   |
|                |                   |                |                |     | nB_4002           | WLTKSGSTY   | WLYKSECTY   | WL*KS**TY     | '001001100'   | -1.27     | 0.34      | 1         |             |       |       |   |
|                |                   |                |                |     | nB_5101           | WLTKSGSTY   | WLYKSECTY   | WL*KS**TY     | '001001100'   | -1.04     | 0.24      | 1         |             |       |       |   |
|                |                   |                |                | 171 | nA_2601           | TKSGSTYPV   | YKSECTYPV   | *KS**TYPV     | '100110000'   | -2.63     | 1.02      | 1         |             |       |       |   |
|                |                   |                |                |     | nB_5101           | TKSGSTYPV   | YKSECTYPV   | *KS**TYPV     | '100110000'   | -1.45     | 0.54      | 1         |             |       |       |   |
|                |                   |                |                | 172 | nB_4002           | KSGSTYPVL   | KSECTYPVQ   | KS**TYPV*     | '001100001'   | -1.75     | 0.52      | 1         |             |       |       |   |
|                |                   |                |                |     | nB_4402           | KSGSTYPVL   | KSECTYPVQ   | KS**TYPV*     | '001100001'   | -1.18     | 1.2       | 1         |             |       |       |   |
|                |                   |                |                | 174 | nB_3501           | GSTYPVLNV   | ECTYPVQNV   | **TYPV*NV     | '110000100'   | -1.08     | 0.24      | 1         |             |       |       |   |
|                |                   |                |                | New | Affinity Increase | 1968_HK68   | 1972_EN72   | 166           | nA_1101       | RLNWLTKSG | RLNWLYKSE | RLNWL*KS* | '000001001' | 1.48  | -1.37 | 1 |
|                |                   |                |                |     |                   |             |             |               | nA_2902       | RLNWLTKSG | RLNWLYKSE | RLNWL*KS* | '000001001' | -0.89 | -2.6  | 1 |
|                |                   |                |                |     |                   |             |             |               | nA_3001       | RLNWLTKSG | RLNWLYKSE | RLNWL*KS* | '000001001' | 0.53  | -1.65 | 1 |
|                | nA_6801           | RLNWLTKSG      | RLNWLYKSE      |     |                   |             |             | RLNWL*KS*     | '000001001'   | -0.27     | -1.64     | 1         |             |       |       |   |
|                | nB_5301           | RLNWLTKSG      | RLNWLYKSE      |     |                   |             |             | RLNWL*KS*     | '000001001'   | 0.31      | -1.51     | 1         |             |       |       |   |
| 167            | nA_0201           | LNWLTKSGS      | LNWLYKSEC      |     |                   |             |             | LNWL*KS**     | '000010011'   | -0.67     | -1.92     | 1         |             |       |       |   |
|                | nA_0206           | LNWLTKSGS      | LNWLYKSEC      |     |                   |             |             | LNWL*KS**     | '000010011'   | -0.44     | -1.66     | 1         |             |       |       |   |
|                | nA_0301           | LNWLTKSGS      | LNWLYKSEC      |     |                   |             |             | LNWL*KS**     | '000010011'   | -0.33     | -1.52     | 1         |             |       |       |   |
|                | nA_2402           | LNWLTKSGS      | LNWLYKSEC      |     |                   |             |             | LNWL*KS**     | '000010011'   | 0.06      | -1.27     | 1         |             |       |       |   |
|                | nA_2403           | LNWLTKSGS      | LNWLYKSEC      |     |                   |             |             | LNWL*KS**     | '000010011'   | -1.49     | -2.74     | 1         |             |       |       |   |
|                | nB_1501           | LNWLTKSGS      | LNWLYKSEC      |     |                   |             |             | LNWL*KS**     | '000010011'   | -1.3      | -2.56     | 1         |             |       |       |   |
|                | nB_1801           | LNWLTKSGS      | LNWLYKSEC      |     |                   |             |             | LNWL*KS**     | '000010011'   | 0.1       | -1.02     | 1         |             |       |       |   |
|                | nB_4001           | LNWLTKSGS      | LNWLYKSEC      |     |                   |             |             | LNWL*KS**     | '000010011'   | 0.64      | -1.5      | 1         |             |       |       |   |
|                | nB_5101           | LNWLTKSGS      | LNWLYKSEC      |     |                   |             |             | LNWL*KS**     | '000010011'   | -0.11     | -1.5      | 1         |             |       |       |   |
| 168            | nA_1101           | NWLTKSGST      | NWLYKSECT      |     |                   |             |             | NWL*KS**T     | '000100110'   | -0.31     | -2.36     | 1         |             |       |       |   |
|                | nA_3002           | NWLTKSGST      | NWLYKSECT      |     |                   |             |             | NWL*KS**T     | '000100110'   | 1.31      | -1.07     | 1         |             |       |       |   |
|                | nB_5801           | NWLTKSGST      | NWLYKSECT      |     |                   |             |             | NWL*KS**T     | '000100110'   | -0.42     | -1.54     | 1         |             |       |       |   |
| 169            | nB_0702           | WLTKSGSTY      | WLYKSECTY      |     |                   |             |             | WL*KS**TY     | '001001100'   | 0.2       | -1.54     | 1         |             |       |       |   |
| 170            | nB_4002           | LTKSGSTYP      | LYKSECTYP      |     |                   |             |             | L*KS**TYP     | '010011000'   | 0         | -1.18     | 1         |             |       |       |   |
| 171            | nA_0203           | TKSGSTYPV      | YKSECTYPV      |     |                   |             |             | *KS**TYPV     | '100110000'   | 0.19      | -1.5      | 1         |             |       |       |   |
|                | nB_4403           | TKSGSTYPV      | YKSECTYPV      |     |                   |             |             | *KS**TYPV     | '100110000'   | -1.51     | -2.86     | 1         |             |       |       |   |
|                | nB_4501           | TKSGSTYPV      | YKSECTYPV      |     |                   |             |             | *KS**TYPV     | '100110000'   | -0.26     | -1.59     | 1         |             |       |       |   |
| 172            | nA_2601           | KSGSTYPVL      | KSECTYPVQ      |     |                   |             |             | KS**TYPV*     | '001100001'   | -0.57     | -2.54     | 1         |             |       |       |   |
|                | nB_0801           | KSGSTYPVL      | KSECTYPVQ      |     |                   |             |             | KS**TYPV*     | '001100001'   | 0.22      | -3.22     | 1         |             |       |       |   |
| 173            | nB_0702           | SGSTYPVLN      | SECTYPVQN      |     |                   |             |             | S**TYPV*N     | '011000010'   | 0.37      | -1.92     | 1         |             |       |       |   |
|                | nB_2705           | SGSTYPVLN      | SECTYPVQN      |     |                   |             |             | S**TYPV*N     | '011000010'   | -0.01     | -2.2      | 1         |             |       |       |   |
|                | nB_3501           | SGSTYPVLN      | SECTYPVQN      |     |                   |             |             | S**TYPV*N     | '011000010'   | 0.17      | -1.4      | 1         |             |       |       |   |
|                | nB_5101           | SGSTYPVLN      | SECTYPVQN      |     |                   |             |             | S**TYPV*N     | '011000010'   | -0.67     | -1.85     | 1         |             |       |       |   |
|                | nB_5401           | SGSTYPVLN      | SECTYPVQN      |     |                   |             |             | S**TYPV*N     | '011000010'   | 0.75      | -1.42     | 1         |             |       |       |   |
| Retained       | Affinity Increase | 1968_HK68      | 1972_EN72      |     |                   |             |             | 166           | nA_3301       | RLNWLTKSG | RLNWLYKSE | RLNWL*KS* | '000001001' | -1.85 | -1.92 | 1 |
|                |                   |                |                |     |                   |             |             | 167           | nA_2301       | LNWLTKSGS | LNWLYKSEC | LNWL*KS** | '000010011' | -1.36 | -1.67 | 1 |
|                |                   |                |                |     | nA_2403           | LNWLTKSGS   | LNWLYKSEC   | LNWL*KS**     | '000010011'   | -1.49     | -2.74     | 1         |             |       |       |   |
|                |                   |                |                |     | nB_1501           | LNWLTKSGS   | LNWLYKSEC   | LNWL*KS**     | '000010011'   | -1.3      | -2.56     | 1         |             |       |       |   |

Homan and Bremel, Supporting Material

| Classification | Change        | Yr Old Cluster | Yr New Cluster | pos | Allele  | Old Peptide | New Peptide | Delta Peptide | Delta Pattern | Old Sigma | New Sigma | N |
|----------------|---------------|----------------|----------------|-----|---------|-------------|-------------|---------------|---------------|-----------|-----------|---|
|                |               |                |                | 168 | nA_2403 | NWLTKSGST   | NWLYKSECT   | NWL*KS**T     | '000100110'   | -1.62     | -1.94     | 1 |
|                |               |                |                | 169 | nA_0101 | WLTKSGSTY   | WLYKSECTY   | WL*KS**TY     | '001001100'   | -1.62     | -1.89     | 1 |
|                |               |                |                |     | nA_2601 | WLTKSGSTY   | WLYKSECTY   | WL*KS**TY     | '001001100'   | -2.13     | -2.34     | 1 |
|                |               |                |                |     | nA_2902 | WLTKSGSTY   | WLYKSECTY   | WL*KS**TY     | '001001100'   | -2.74     | -3.25     | 1 |
|                |               |                |                |     | nB_5801 | WLTKSGSTY   | WLYKSECTY   | WL*KS**TY     | '001001100'   | -1.86     | -2.23     | 1 |
|                |               |                |                | 170 | nA_3001 | LTKSGSTYP   | LYKSECTYP   | L*KS**TYP     | '010011000'   | -1.3      | -1.91     | 1 |
|                |               |                |                | 171 | nB_4002 | TKSGSTYPV   | YKSECTYPV   | *KS**TYPV     | '100110000'   | -1.32     | -2.2      | 1 |
|                |               |                |                |     | nB_4403 | TKSGSTYPV   | YKSECTYPV   | *KS**TYPV     | '100110000'   | -1.51     | -2.86     | 1 |
|                |               |                |                | 172 | nA_0203 | KSGSTYPVL   | KSECTYPVQ   | KS**TYPV*     | '001100001'   | -1.64     | -1.95     | 1 |
|                |               |                |                |     | nA_2301 | KSGSTYPVL   | KSECTYPVQ   | KS**TYPV*     | '001100001'   | -1.24     | -1.33     | 1 |
|                |               |                |                |     | nA_2402 | KSGSTYPVL   | KSECTYPVQ   | KS**TYPV*     | '001100001'   | -1.14     | -1.32     | 1 |
|                |               |                |                | 173 | nB_5701 | SGSTYPVLN   | SECTYPVQN   | S**TYPV*N     | '011000010'   | -1.01     | -1.2      | 1 |
|                |               |                |                | 174 | nA_0101 | GSTYPVLNV   | ECTYPVQNV   | **TYPV*NV     | '110000100'   | -1.47     | -2.1      | 1 |
|                | Affinity Loss | 1968_HK68      | 1972_EN72      | 166 | nA_0301 | RLNWLTKSG   | RLNWLYKSE   | RLNWL*KS*     | '000001001'   | -2.1      | -1.18     | 1 |
|                |               |                |                | 167 | nA_3101 | LNWLTKSGS   | LNWLYKSEC   | LNWL*KS**     | '000010011'   | -1.66     | -1.61     | 1 |
|                |               |                |                | 168 | nA_3301 | NWLTKSGST   | NWLYKSECT   | NWL*KS**T     | '000100110'   | -2.03     | -1.82     | 1 |
|                |               |                |                |     | nB_5301 | NWLTKSGST   | NWLYKSECT   | NWL*KS**T     | '000100110'   | -1.82     | -1.35     | 1 |
|                |               |                |                | 169 | nA_0201 | WLTKSGSTY   | WLYKSECTY   | WL*KS**TY     | '001001100'   | -1.71     | -1.59     | 1 |
|                |               |                |                | 172 | nA_0202 | KSGSTYPVL   | KSECTYPVQ   | KS**TYPV*     | '001100001'   | -2.02     | -1.76     | 1 |
|                |               |                |                |     | nB_3501 | KSGSTYPVL   | KSECTYPVQ   | KS**TYPV*     | '001100001'   | -1.98     | -1.03     | 1 |
|                |               |                |                | 173 | nA_3001 | SGSTYPVLN   | SECTYPVQN   | S**TYPV*N     | '011000010'   | -2.04     | -1.81     | 1 |
|                |               |                |                |     | nB_4002 | SGSTYPVLN   | SECTYPVQN   | S**TYPV*N     | '011000010'   | -1.75     | -1.22     | 1 |
|                |               |                |                | 174 | nA_6901 | GSTYPVLNV   | ECTYPVQNV   | **TYPV*NV     | '110000100'   | -2.36     | -1.5      | 1 |
|                |               |                |                |     | nB_0801 | GSTYPVLNV   | ECTYPVQNV   | **TYPV*NV     | '110000100'   | -1.69     | -1.27     | 1 |
|                |               |                |                |     | nB_4001 | GSTYPVLNV   | ECTYPVQNV   | **TYPV*NV     | '110000100'   | -2.72     | -1.25     | 1 |

76675 rows have been excluded.

Homan and Bremel, Supporting Material

MHC II (Highly Mutable Region) HK68-> EN72 Transition

| Classification | Change            | Yr Old Cluster  | Yr New Cluster  | Allele     | pos               | Old Peptide     | New Peptide     | Delta Peptide   | Delta Pattern     | Old Sigma       | New Sigma       | N                 |                   |       |       |   |
|----------------|-------------------|-----------------|-----------------|------------|-------------------|-----------------|-----------------|-----------------|-------------------|-----------------|-----------------|-------------------|-------------------|-------|-------|---|
| Lost           | Affinity Loss     | 1968_HK68       | 1972_EN72       | nDRB1_0802 | 166               | RLNWLTKSGSTYPVL | RLNWLYKSECTYPVQ | RLNWL*KS**TYPV* | '000001001100001' | -1.26           | 0.23            | 1                 |                   |       |       |   |
|                |                   |                 |                 | nDRB1_1501 | 173               | SGSTYPVLNVTMPNN | SECTYPVQNVTMPNN | S**TYPV*NVTMPNN | '011000010000000' | -1.1            | 0.94            | 1                 |                   |       |       |   |
| New            | Affinity Increase | 1968_HK68       | 1972_EN72       | nDRB1_0101 | 167               | LNWLTKSGSTYPVLN | LNWLYKSECTYPVQN | LNWL*KS**TYPV*N | '000010011000010' | 0.05            | -1.02           | 1                 |                   |       |       |   |
|                |                   |                 |                 |            | 169               | WLTKSGSTYPVLNVT | WLYKSECTYPVQNV  | WL*KS**TYPV*NVT | '001001100001000' | 0.39            | -1.23           | 1                 |                   |       |       |   |
|                |                   |                 |                 | nDRB1_0301 | 167               | LNWLTKSGSTYPVLN | LNWLYKSECTYPVQN | LNWL*KS**TYPV*N | '000010011000010' | -1.61           | -2.69           | 1                 |                   |       |       |   |
|                |                   |                 |                 | nDRB1_0401 | 167               | LNWLTKSGSTYPVLN | LNWLYKSECTYPVQN | LNWL*KS**TYPV*N | '000010011000010' | -0.41           | -1.5            | 1                 |                   |       |       |   |
|                |                   |                 |                 |            | 169               | WLTKSGSTYPVLNVT | WLYKSECTYPVQNV  | WL*KS**TYPV*NVT | '001001100001000' | -0.15           | -2.1            | 1                 |                   |       |       |   |
|                |                   |                 |                 |            | 172               | KSGSTYPVLNVTMPN | KSECTYPVQNVTMPN | KS**TYPV*NVTMPN | '001100001000000' | 1.4             | -1.23           | 1                 |                   |       |       |   |
|                |                   |                 |                 | nDRB1_0404 | 172               | KSGSTYPVLNVTMPN | KSECTYPVQNVTMPN | KS**TYPV*NVTMPN | '001100001000000' | -0.45           | -1.47           | 1                 |                   |       |       |   |
|                |                   |                 |                 | nDRB1_0701 | 172               | KSGSTYPVLNVTMPN | KSECTYPVQNVTMPN | KS**TYPV*NVTMPN | '001100001000000' | 0.72            | -1.03           | 1                 |                   |       |       |   |
|                |                   |                 |                 | nDRB1_0901 | 172               | KSGSTYPVLNVTMPN | KSECTYPVQNVTMPN | KS**TYPV*NVTMPN | '001100001000000' | 0.08            | -1.29           | 1                 |                   |       |       |   |
|                |                   |                 |                 | nDRB3_0101 | 167               | LNWLTKSGSTYPVLN | LNWLYKSECTYPVQN | LNWL*KS**TYPV*N | '000010011000010' | -1.02           | -2.87           | 1                 |                   |       |       |   |
|                |                   |                 |                 |            | 173               | SGSTYPVLNVTMPNN | SECTYPVQNVTMPNN | S**TYPV*NVTMPNN | '011000010000000' | 1.14            | -1.13           | 1                 |                   |       |       |   |
|                |                   |                 |                 | nDRB5_0101 | 171               | TKSGSTYPVLNVTMP | YKSECTYPVQNVTMP | *KS**TYPV*NVTMP | '100110000100000' | 0.26            | -1.39           | 1                 |                   |       |       |   |
|                |                   |                 |                 | Retained   | Affinity Increase | 1968_HK68       | 1972_EN72       | nDRB1_0301      | 167               | LNWLTKSGSTYPVLN | LNWLYKSECTYPVQN | LNWL*KS**TYPV*N   | '000010011000010' | -1.61 | -2.69 | 1 |
|                |                   |                 |                 |            |                   |                 |                 | nDRB1_0401      | 168               | NWLTKSGSTYPVLNV | NWLYKSECTYPVQNV | NWL*KS**TYPV*N    | '000100110000100' | -1.46 | -1.49 | 1 |
|                |                   |                 |                 |            |                   |                 |                 | nDRB1_1101      | 166               | RLNWLTKSGSTYPVL | RLNWLYKSECTYPVQ | RLNWL*KS**TYPV*   | '000001001100001' | -1.23 | -1.81 | 1 |
| nDRB1_1302     | 168               | NWLTKSGSTYPVLNV | NWLYKSECTYPVQNV |            |                   |                 |                 | NWL*KS**TYPV*N  | '000100110000100' | -1.01           | -1.21           | 1                 |                   |       |       |   |
| nDRB3_0101     | 167               | LNWLTKSGSTYPVLN | LNWLYKSECTYPVQN |            |                   |                 |                 | LNWL*KS**TYPV*N | '000010011000010' | -1.02           | -2.87           | 1                 |                   |       |       |   |
| Affinity Loss  | 1968_HK68         | 1972_EN72       | nDRB1_0301      |            |                   |                 |                 | 166             | RLNWLTKSGSTYPVL   | RLNWLYKSECTYPVQ | RLNWL*KS**TYPV* | '000001001100001' | -1.63             | -1.2  | 1     |   |
|                |                   |                 |                 |            |                   |                 |                 | 168             | NWLTKSGSTYPVLNV   | NWLYKSECTYPVQNV | NWL*KS**TYPV*N  | '000100110000100' | -1.88             | -1.47 | 1     |   |
|                |                   |                 | nDRB1_0401      |            |                   |                 |                 | 166             | RLNWLTKSGSTYPVL   | RLNWLYKSECTYPVQ | RLNWL*KS**TYPV* | '000001001100001' | -3.58             | -1.86 | 1     |   |
|                |                   |                 | nDRB1_0701      |            |                   |                 |                 | 166             | RLNWLTKSGSTYPVL   | RLNWLYKSECTYPVQ | RLNWL*KS**TYPV* | '000001001100001' | -1.76             | -1.22 | 1     |   |
|                |                   |                 | nDRB3_0101      |            |                   |                 |                 | 166             | RLNWLTKSGSTYPVL   | RLNWLYKSECTYPVQ | RLNWL*KS**TYPV* | '000001001100001' | -2.35             | -1.08 | 1     |   |

29215 rows have been excluded.
